# Supplementary material
Source: publisher figshare collection journal article supplement (https://acs.figshare.com/ndownloader/files/3952246)
Supplement: Supplementary file 1 [file 3952246]

**Supporting Information:**

**Development of a thyroperoxidase inhibition assay for high through-put screening**

Katie B. Paul<sup>1,2</sup>, Joan M. Hedge<sup>2</sup>, Daniel M. Rotroff<sup>3</sup>, Michael W. Hornung<sup>4</sup>, Kevin M. Crofton<sup>2</sup>,  
Steven O. Simmons<sup>2</sup>

<sup>1</sup>Oak Ridge Institute for Science Education Postdoctoral Fellow; <sup>2</sup>Integrated Systems Toxicology Division, <sup>4</sup>Mid-Continent Ecology Division, National Health and Environmental Effects Research Laboratory, National Center for Computational Toxicology<sup>3</sup>, Office of Research and Development, U.S. Environmental Protection Agency

**Table S1: Summary of selected optimization experiments for the 96-well format AUR-TPO assays**

| Condition#           | Microsome Lot# | Protein/Reaction ( $\mu\text{g}$ ) | AUR substrate concentration ( $\mu\text{M}$ ) <sup>b</sup> | Dynamic Range <sup>a</sup> | IC <sub>50</sub> ( $\mu\text{M}$ ) | Z'          |
|----------------------|----------------|------------------------------------|------------------------------------------------------------|----------------------------|------------------------------------|-------------|
| <b>1<sup>c</sup></b> | <b>10</b>      | <b>12.5</b>                        | <b>25</b>                                                  | <b>5.79</b>                | <b>0.050</b>                       | <b>0.98</b> |
| 2                    | 10             | 50                                 | 25                                                         | 7.36                       | 0.13                               | 0.92        |
| <b>1<sup>c</sup></b> | <b>11</b>      | <b>12.5</b>                        | <b>25</b>                                                  | <b>6.29</b>                | <b>0.078</b>                       | <b>0.89</b> |
| 2                    | 11             | 50                                 | 25                                                         | 4.93                       | 0.28                               | 0.84        |
| 3                    | 10             | 12.5                               | 50                                                         | 3.27                       | 0.063                              | 0.96        |
| 4                    | 10             | 50                                 | 50                                                         | 4.49                       | 0.16                               | 0.92        |
| 3                    | 11             | 12.5                               | 50                                                         | 3.55                       | 0.05                               | 0.96        |
| 4                    | 11             | 50                                 | 50                                                         | 3.74                       | 0.26                               | 0.77        |
| 5                    | 10             | 12.5                               | 100                                                        | 2.73                       | 1.0                                | 0.97        |
| 6                    | 10             | 50                                 | 100                                                        | 3.61                       | 0.62                               | 0.98        |
| 5                    | 11             | 12.5                               | 100                                                        | 2.40                       | 0.24                               | 0.93        |
| 6                    | 11             | 50                                 | 100                                                        | 2.76                       | 0.91                               | 0.93        |

<sup>a</sup>Calculated using response data from 100  $\mu\text{M}$  MMI as the maximum response compared to vehicle control.

<sup>b</sup>Final concentration in the assay.

<sup>c</sup>Bolded condition one was selected for the 96-well format assay procedure.

**Figure S1: Example Amplex UltraRed (AUR) rat thyroperoxidase inhibition assay profile by time**

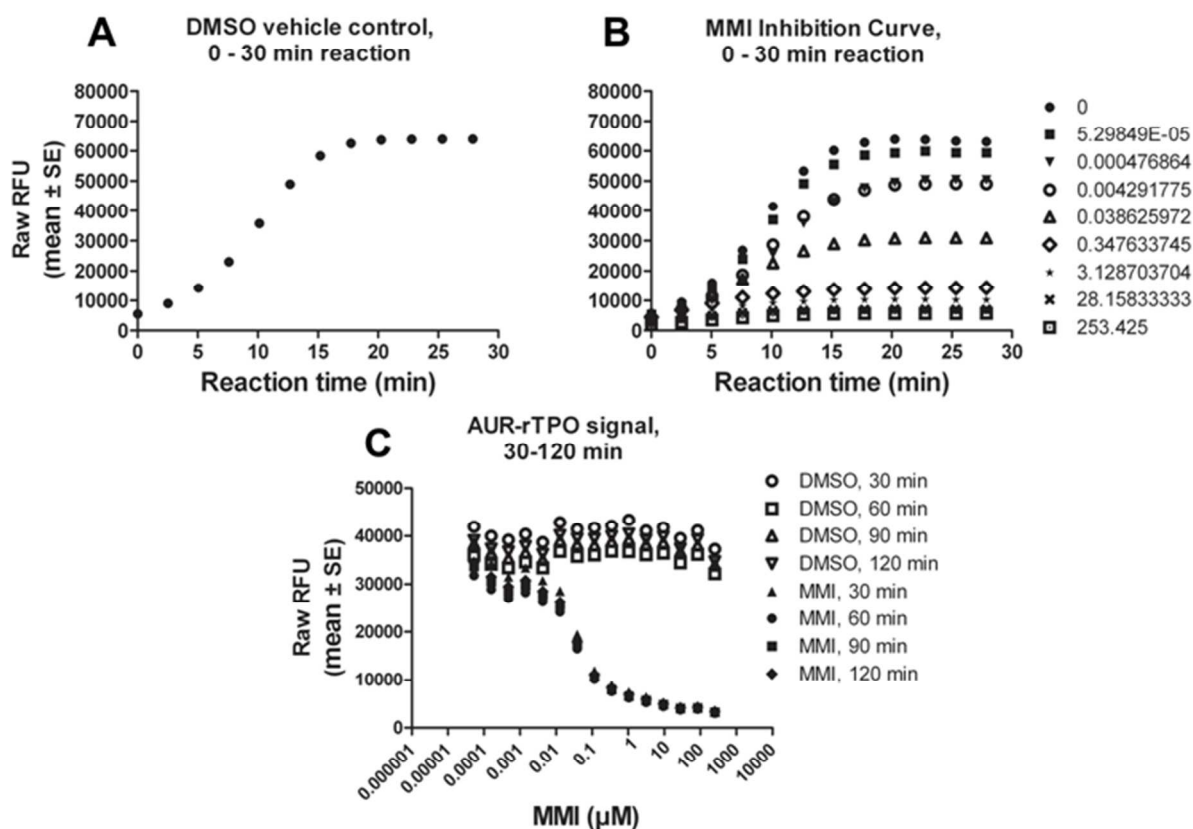

**Figure S1A-C. AUR-rTPO signal over time.** A. The DMSO vehicle control AUR-rTPO signal reaches a maximum stable signal between 15 and 20 min post-initiation of the peroxidase reaction; note that the maximum RFU that can be detected is 65000. B. The AUR-rTPO signal for a MMI concentration response curve stabilizes between 15 and 20 min post-initiation of the peroxidase reaction, and a concentration-dependent response is evident as increasing MMI concentration corresponds to decreased stable RFU. C. The AUR-rTPO signal for DMSO vehicle and MMI concentration response can be read with stable signal for at least 2 hr post-initiation of the peroxidase reaction without loss or change in signal. RFU = raw fluorescence units; DMSO = dimethyl sulfoxide, vehicle control data; MMI = methimazole concentration response data.

**Figure S2: DMSO sensitivity of the AUR-TPO assay in a 96-well format**

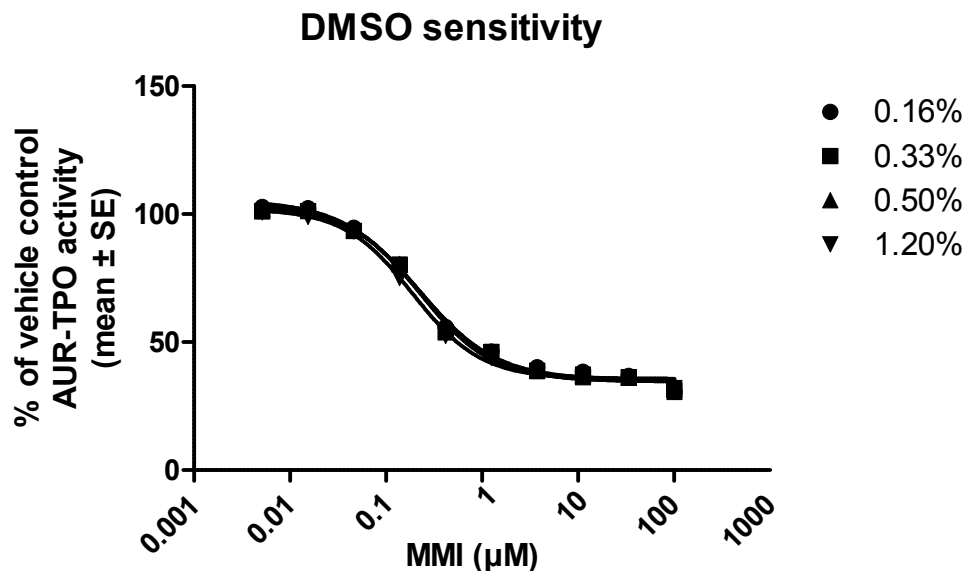

| DMSO concentration (%) | MMI IC <sub>50</sub> (µM) | 95% confidence interval for IC <sub>50</sub> |
|------------------------|---------------------------|----------------------------------------------|
| 0.16                   | 0.2192                    | 0.1521 to 0.3158                             |
| 0.33                   | 0.2271                    | 0.1608 to 0.3207                             |
| 0.50                   | 0.2315                    | 0.1640 to 0.3267                             |
| 1.20                   | 0.1895                    | 0.1468 to 0.2445                             |

**Figure S2.** DMSO sensitivity of the AUR-TPO assay in a 96-well format (n=2). MMI concentration-response curves in the AUR-TPO assay are shown with 0.16%, 0.33%, 0.50%, and 1.20% DMSO included in the reaction. The AUR-TPO assay does not appear sensitive to DMSO as assessed by comparing positive control MMI curves across increasing concentrations of solvent. The 96- and 384-well formats of the assay are routinely performed with 0.16 and 0.41% of DMSO, respectively
